# Supplementary material for: Ohmic heating as a new efficient process for organic synthesis in water
Source: Royal Society of Chemistry journal article supplement (doi:10.1039/c3gc36881e), 2013-01-01
Supplement: c3gc36881e.pdf [file c3gc36881e.pdf]

## Supplementary material

# Ohmic heating as a new efficient process for organic synthesis in water

Joana Pinto,<sup>a</sup> Vera L. M. Silva,<sup>a\*</sup> Ana M. G. Silva,<sup>b</sup> Artur M. S. Silva,<sup>a\*</sup> José C. S. Costa,<sup>c</sup> Luís M. N. B. F. Santos<sup>c\*</sup>, Roger Enes,<sup>a</sup> José A. S. Cavaleiro<sup>a</sup>, António A. M. O. S. Vicente<sup>d</sup> and José A. C. Teixeira<sup>d</sup>

<sup>a</sup> Department of Chemistry & QOPNA, University of Aveiro, 3810-193 Aveiro, Portugal

<sup>b</sup> REQUIMTE, Department of Chemistry and Biochemistry, Faculty of Sciences, University of Porto, 4169-007, Porto, Portugal

<sup>c</sup> Centro de Investigação em Química, Departamento de Química e Bioquímica, Faculdade de Ciências da Universidade do Porto, Rua Campo Alegre 687, 4169-007 Porto, Portugal

<sup>d</sup> IBB-Institute for Biotechnology and Bioengineering, Centre of Biological Engineering, Universidade do Minho, Campus de Gualtar, P-4710-057 Braga, Portugal

## Table of Contents:

### 1. Ohmic heating reactor

**Figure S1.** Schematic representation of the ohmic heating reactor apparatus.....3

**Figure S2.** Detailed representation of the ohmic heating 50 mL glass vessel reactor. The temperature sensor is located between the heating electrodes.....4

**Figure S3.** Detailed representation of the ohmic heating electrodes and their dimensions.....5

**Figure S4.** 50 mL Glass Vessel Reactor.....6

### 2. Results of monitoring the heating power (Temperature, Power, AC Current and AC Voltage) along the reaction heating time using the ohmic heating apparatus /methodology

**Figure S5.** Results of monitoring the heating power (Temperature, Power, AC Current and AC Voltage) along the reaction heating time: heating of a solution of 30 mg NaCl in 25 mL of water, ( $c=0.02 \text{ mol dm}^{-3}$ ).....7

**Figure S6-** Typical results of monitoring the heating power (Temperature, Power, AC Current and AC Voltage): charts of the Diels-Alder reaction.....8

**Figure S7-** Results of monitoring the heating power (Temperature, Power, AC Current and AC Voltage): comparison between charts obtained for the NaCl solution ( $c=0.02 \text{ mol dm}^{-3}$ ) and those obtained for the Diels-Alder reaction.....9

**Figure S8-** Results of monitoring the heating power (Temperature, Power, AC Current and AC Voltage): heating of a solution of 403 mg  $\text{Na}_2\text{CO}_3$  in 25 mL of water ( $c=0.15 \text{ mol dm}^{-3}$ ).....10

**Figure S9-** Typical results of monitoring the heating power (Temperature, Power, AC Current and AC Voltage): charts of the Suzuki reaction.....11

**Figure S10** –Results of monitoring the heating power (Temperature, Power, AC Current and AC Voltage): comparison between the charts of the  $\text{Na}_2\text{CO}_3$  solution ( $c=0.15 \text{ mol dm}^{-3}$ ) and those of the Suzuki reaction.....12

**Figure S11** – Results of monitoring the heating power (Temperature, Power, AC Current and AC Voltage): ohmic heating of NaCl solutions with different concentrations (volume of water: 25mL; position 10 on the power amplifier).....13

### 3. NMR spectra

**Figure S12.**  $^1\text{H}$  NMR spectrum of compound **3** ( $\text{CDCl}_3$ ; 300.13 MHz).....14

**Figure S13.**  $^{13}\text{C}$  NMR spectrum of compound **3** ( $\text{CDCl}_3$ ; 75.47 MHz).....14

**Figure S14.**  $^1\text{H}$  NMR spectrum of compound **6** ( $\text{DMSO}-d_6$ ; 300.13 MHz).....15

**Figure S15.**  $^{13}\text{C}$  NMR spectrum of compound **6** ( $\text{DMSO}-d_6$ ; 75.47 MHz).....16

**Figure S16.**  $^1\text{H}$  NMR spectrum of compound **9** ( $\text{CDCl}_3$ ; 300.13 MHz).....16

**Figure S17.**  $^{13}\text{C}$  NMR spectrum of compound **9** ( $\text{CDCl}_3$ ; 75.47 MHz).....17

**Figure S18.**  $^1\text{H}$  NMR spectrum of compound **12** ( $\text{CDCl}_3$ ; 300.13 MHz).....18

**Figure S19.**  $^{13}\text{C}$  NMR spectrum of compound **12** ( $\text{CDCl}_3$ ; 75.47 MHz).....19

PAPER

www.rsc.org/[journal] | [Green Chemistry]

1. Ohmic heating reactor

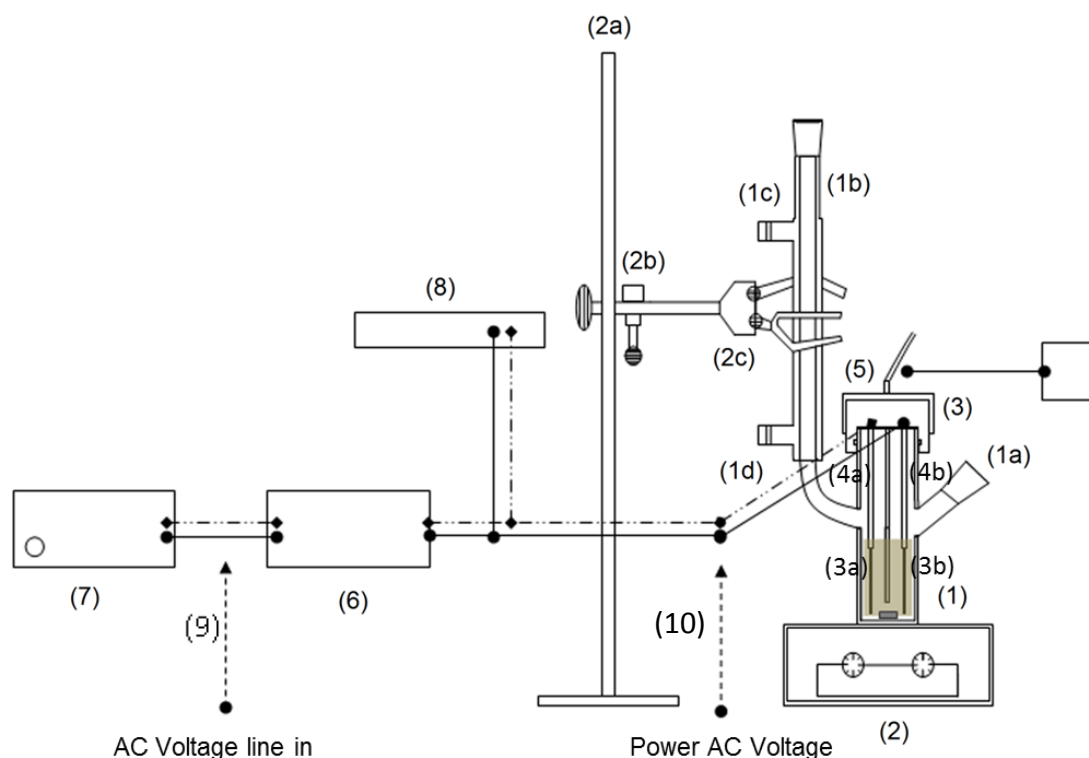

1- Glass vessel reactor (1a, side arm for addition of reagents; 1b, condenser; 1c thread for water outlet pipe; 1d, thread for water inlet pipe).

2- Magnetic stirring plate and cylindrical magnetic stirrer (10 mm length) and 2a, 2b, 2c: supporters.

3-Reactor cover (PEEK, Polyether ether ketone).

3a,3b,4a,4b- Stainless steel (316) rectangular electrodes (dimensions: 40 mm length x 25 mm wide; 1 mm thickness); distance between the electrodes: 23 mm).

5- Type J glass sheathed thermocouple, (glass tube with 6mm external diameter, 4mm internal diameter and thickness 1 mm, conical at the bottom)

6- MOSFET Power amplifier (Velleman model QUBIC VPA21300MB, 2600 Watts Max, bridged mode).

7- Signal function generator (Topward function generator 8110)

8- Agilent 34972A LXI Data Acquisition / Data Logger and Switch Unit (Data acquisition of temperature, voltage, frequency, electric current and power in the reactor is done using a software application developed in Agilent VEE).

**Figure S1** – Schematic representation of the ohmic heating reactor apparatus.

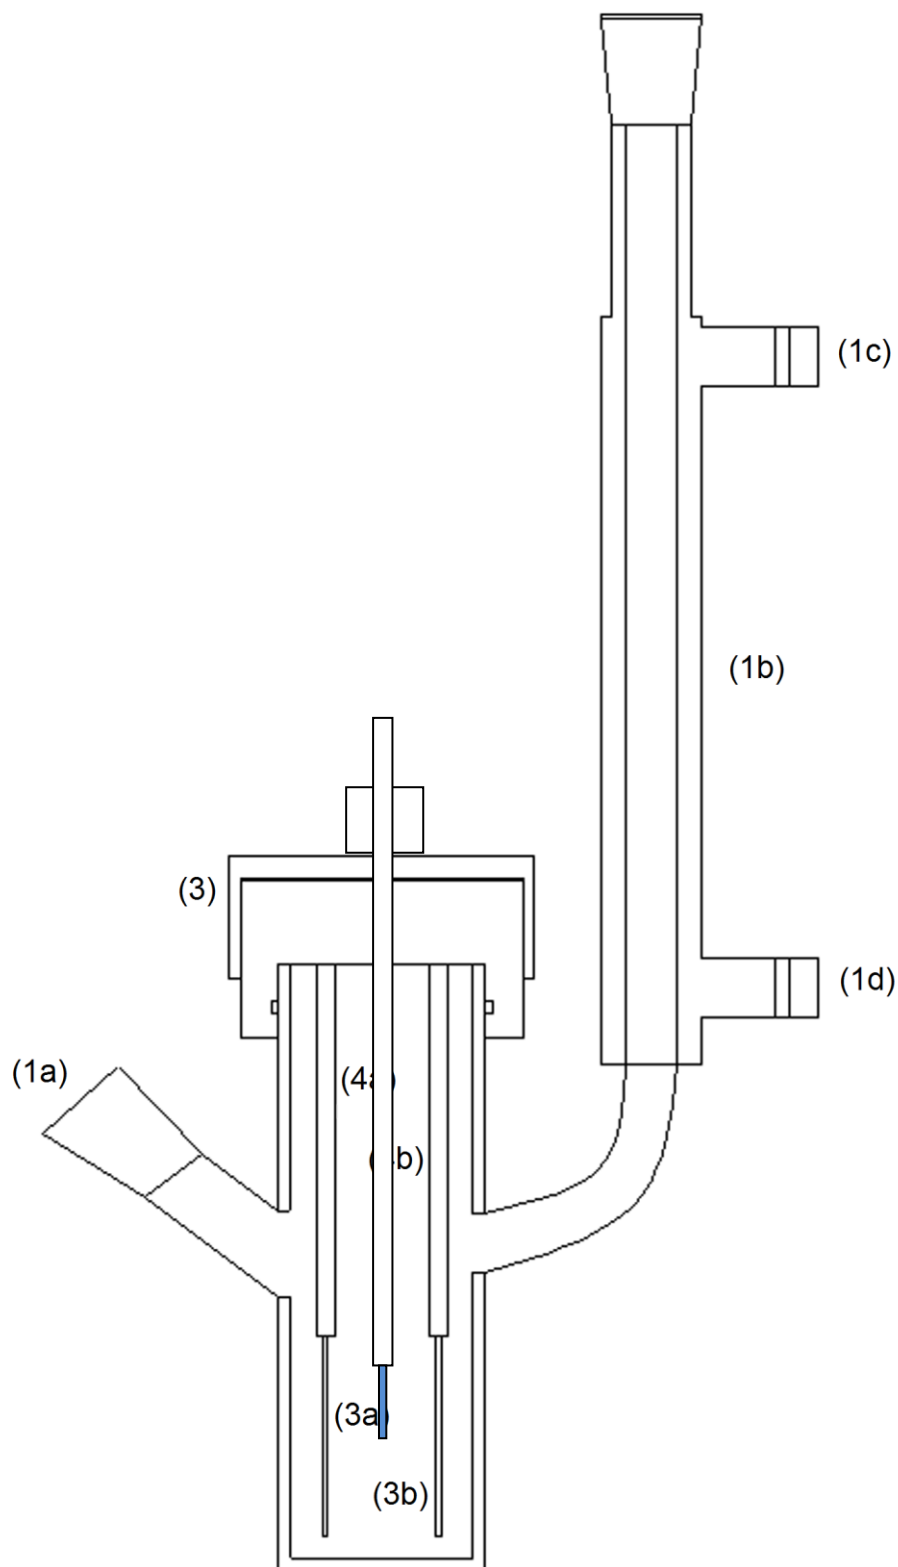

**Figure S2** – Detailed representation of the ohmic heating 50 mL glass vessel reactor. The temperature sensor is located between the heating electrodes.

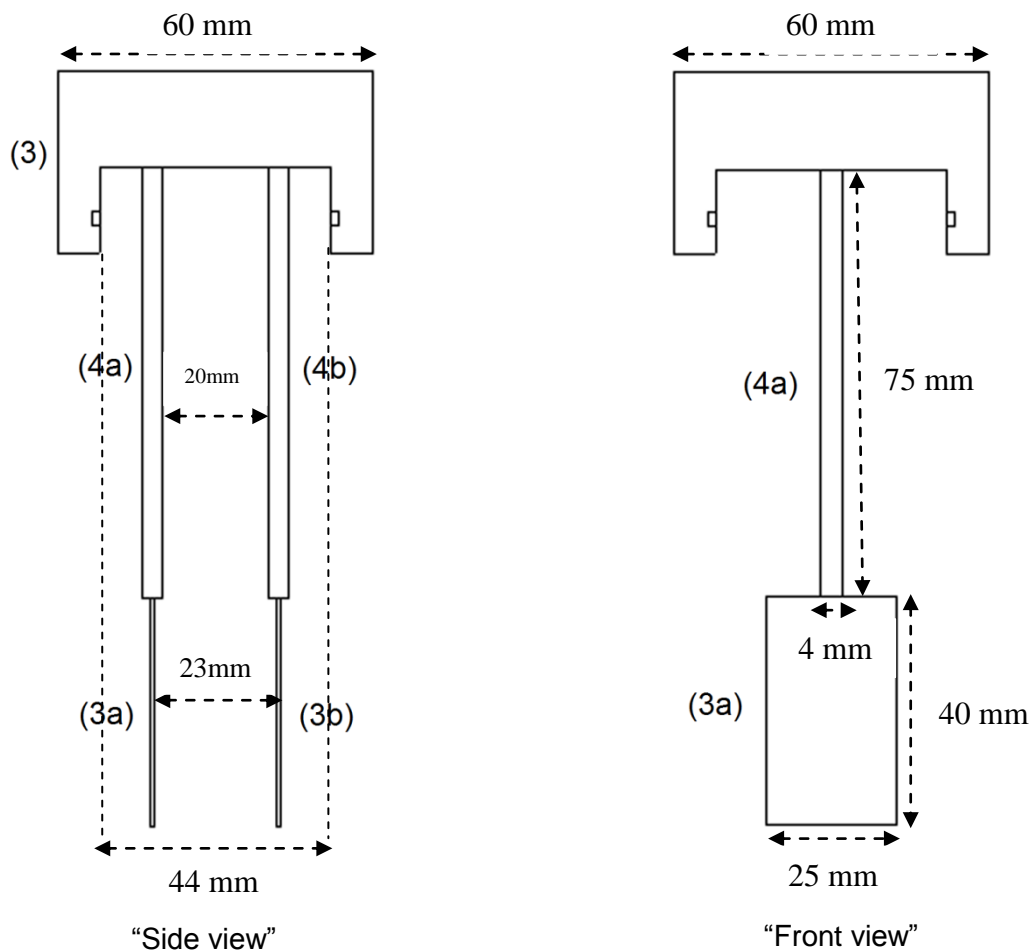

3- Reactor cover (PEEK, Polyether ether ketone).

3a,3b- Stainless steel (316) rectangular electrodes (dimensions: 40 mm length x 25 mm wide; 1 mm thickness) (for a volume of 25 mL the length of the electrode inside the solution/ reaction media is 20 mm).

4a,4b- Stainless steel rod with the electrodes.

**Figure S3** – Detailed representation of the ohmic heating electrodes and their dimensions.

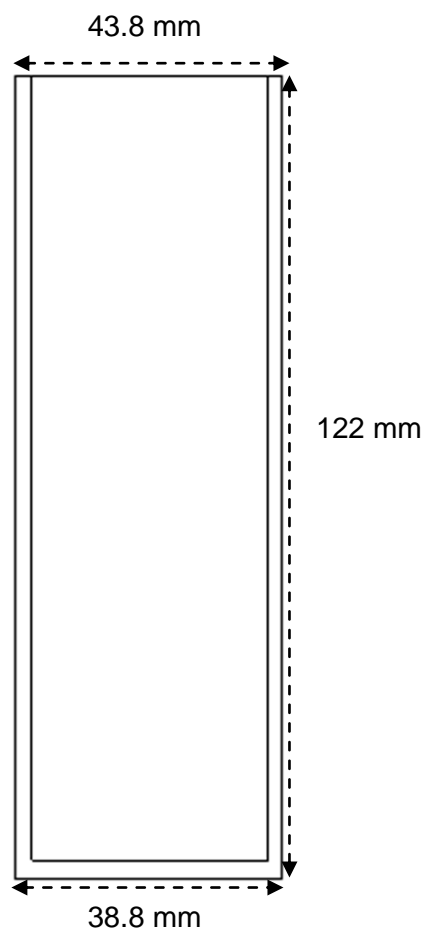

**Figure S4** – 50 mL Glass Vessel Reactor.

## 2. Results of monitoring the heating power (Temperature, Power, AC Current and AC Voltage) along the reaction heating time using the ohmic heating apparatus /methodology

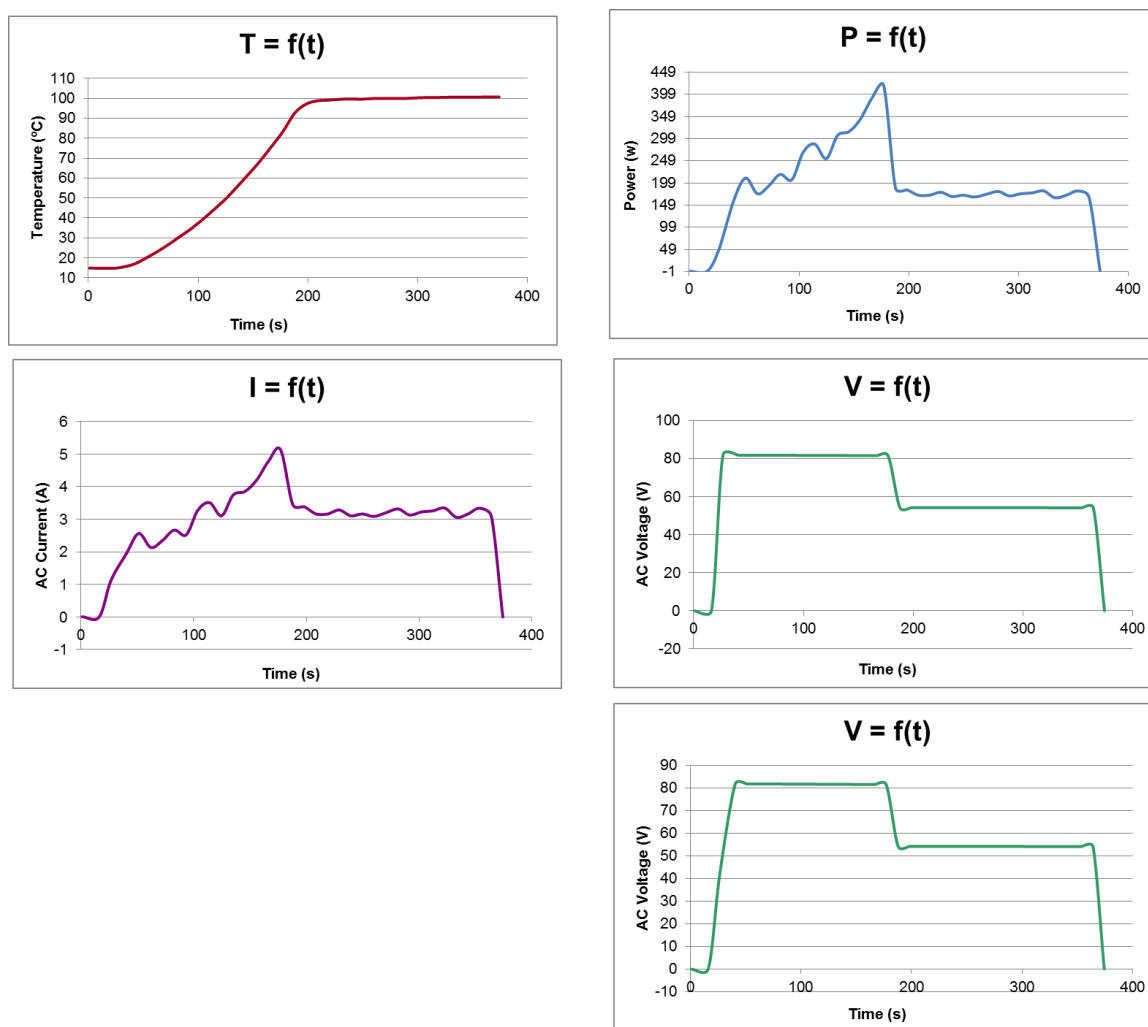

**Figure S5-** Results of monitoring the heating power (Temperature, Power, AC Current and AC Voltage) along the reaction heating time: heating of a solution of 30 mg NaCl in 25 mL of water ( $c=0.02 \text{ mol dm}^{-3}$ ).

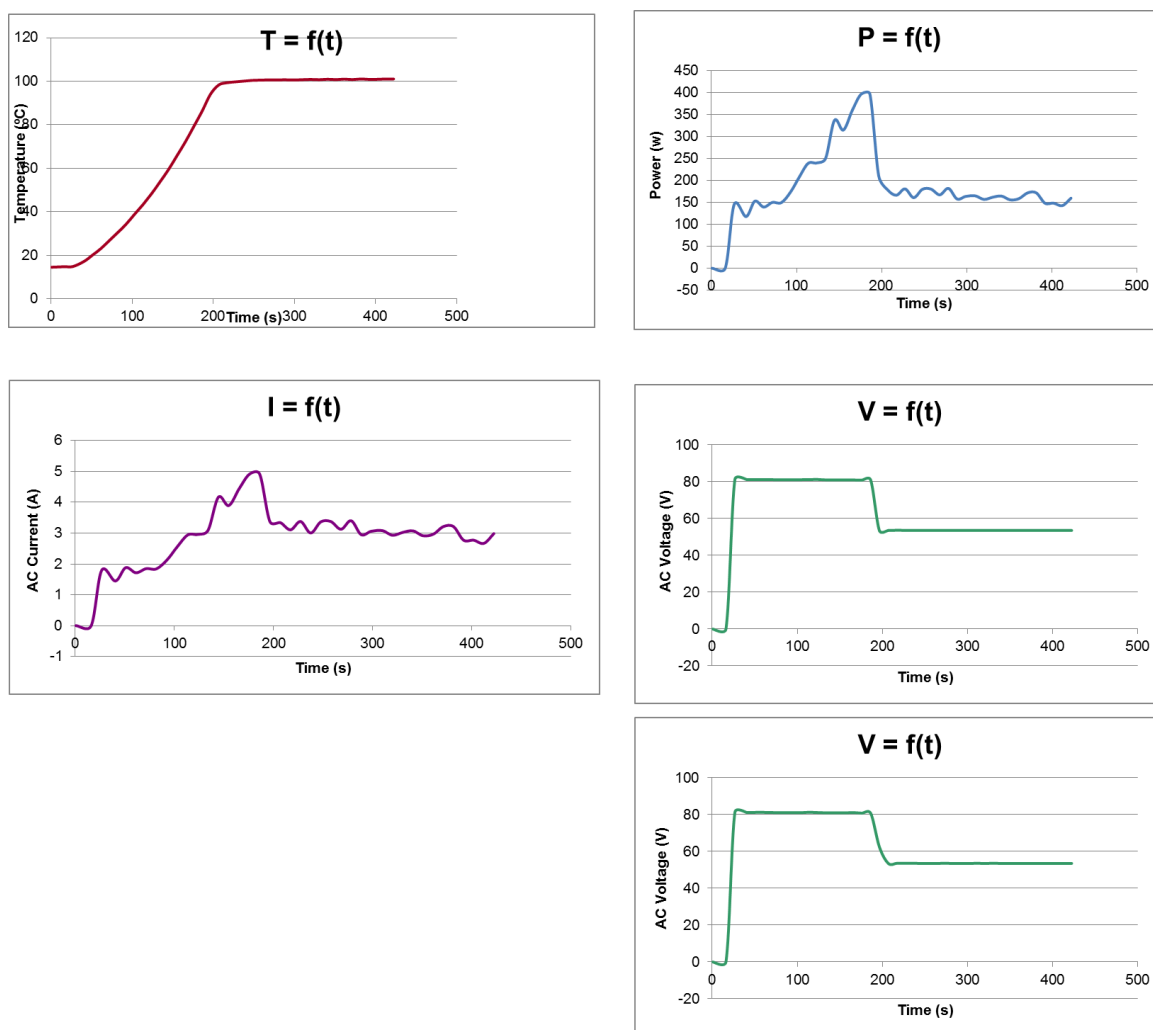

**Figure S6-** Typical results of monitoring the heating power (Temperature, Power, AC Current and AC Voltage) of the Diels-Alder reaction.



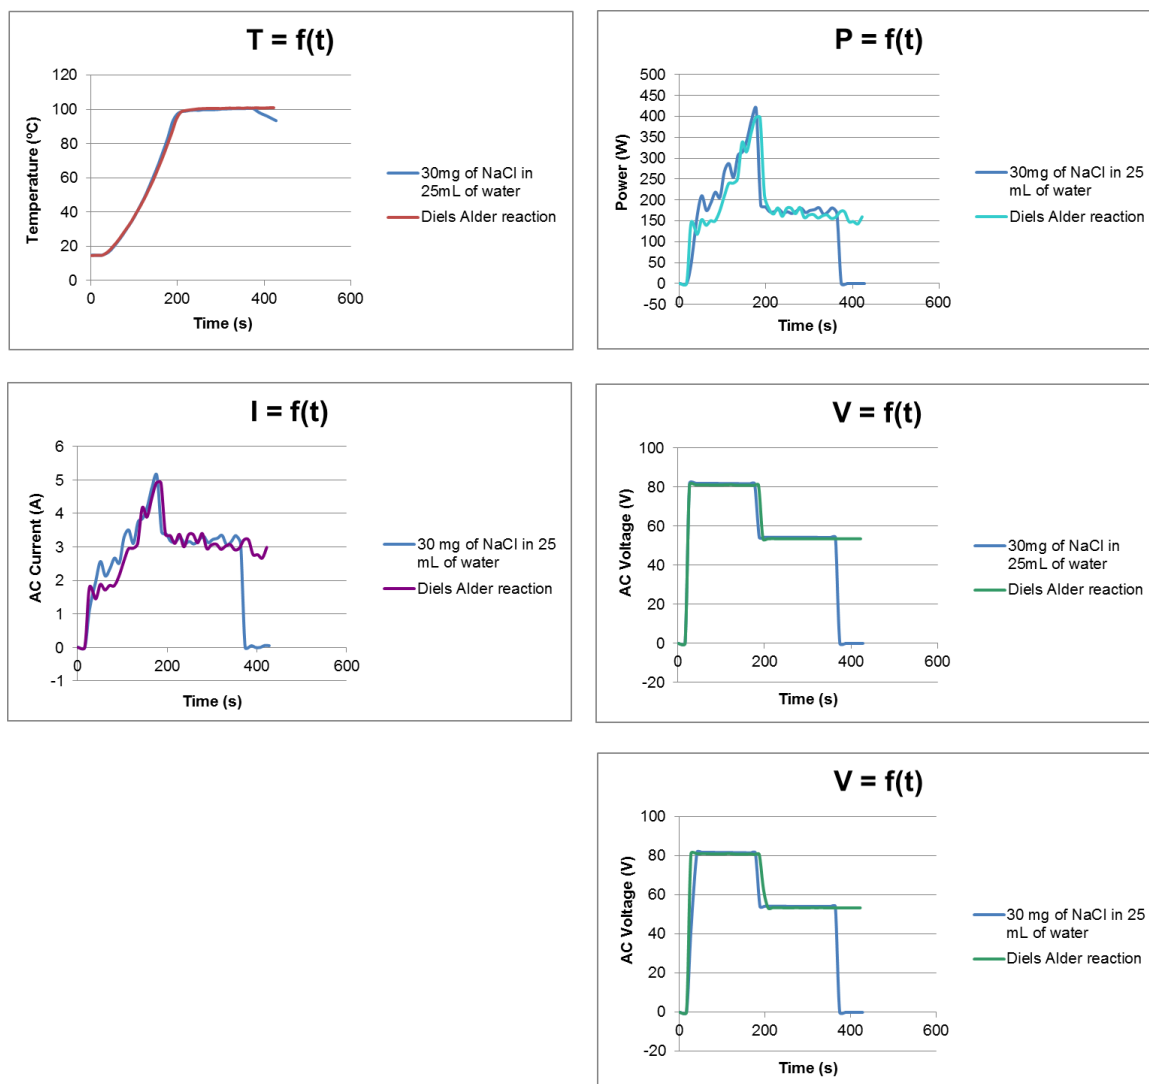

**Figure S7** – Results of monitoring the heating power (Temperature, Power, AC Current and AC Voltage): comparison between the results obtained for the NaCl solution ( $c = 0.02 \text{ mol dm}^{-3}$ ) and those obtained for the Diels-Alder reaction.

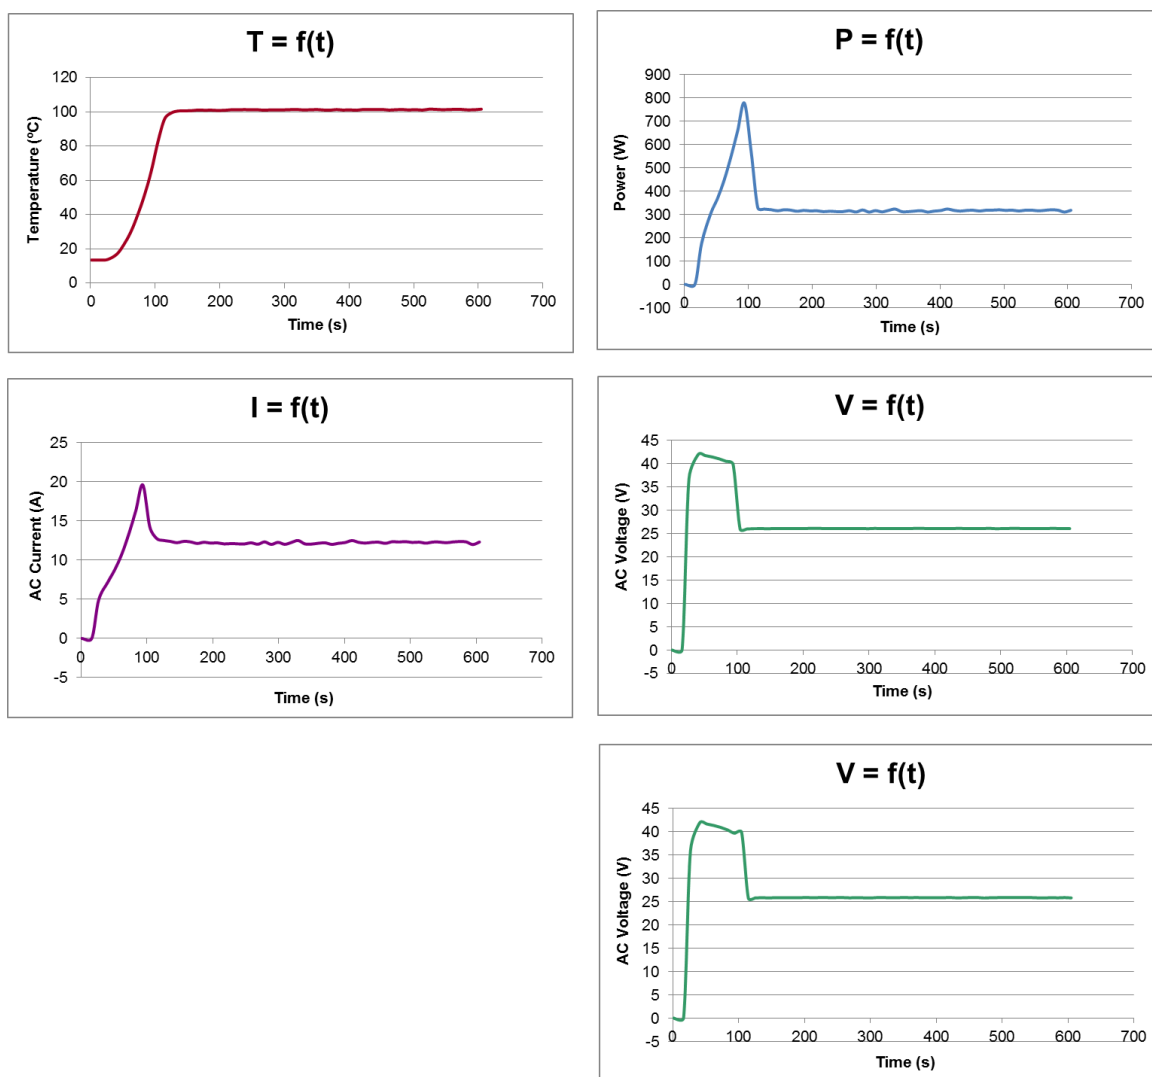

**Figure S8-** Results of monitoring the heating power (Temperature, Power, AC Current and AC Voltage): heating of a solution of 403 mg  $\text{Na}_2\text{CO}_3$  in 25 mL of water ( $c=0.15 \text{ mol dm}^{-3}$ ).

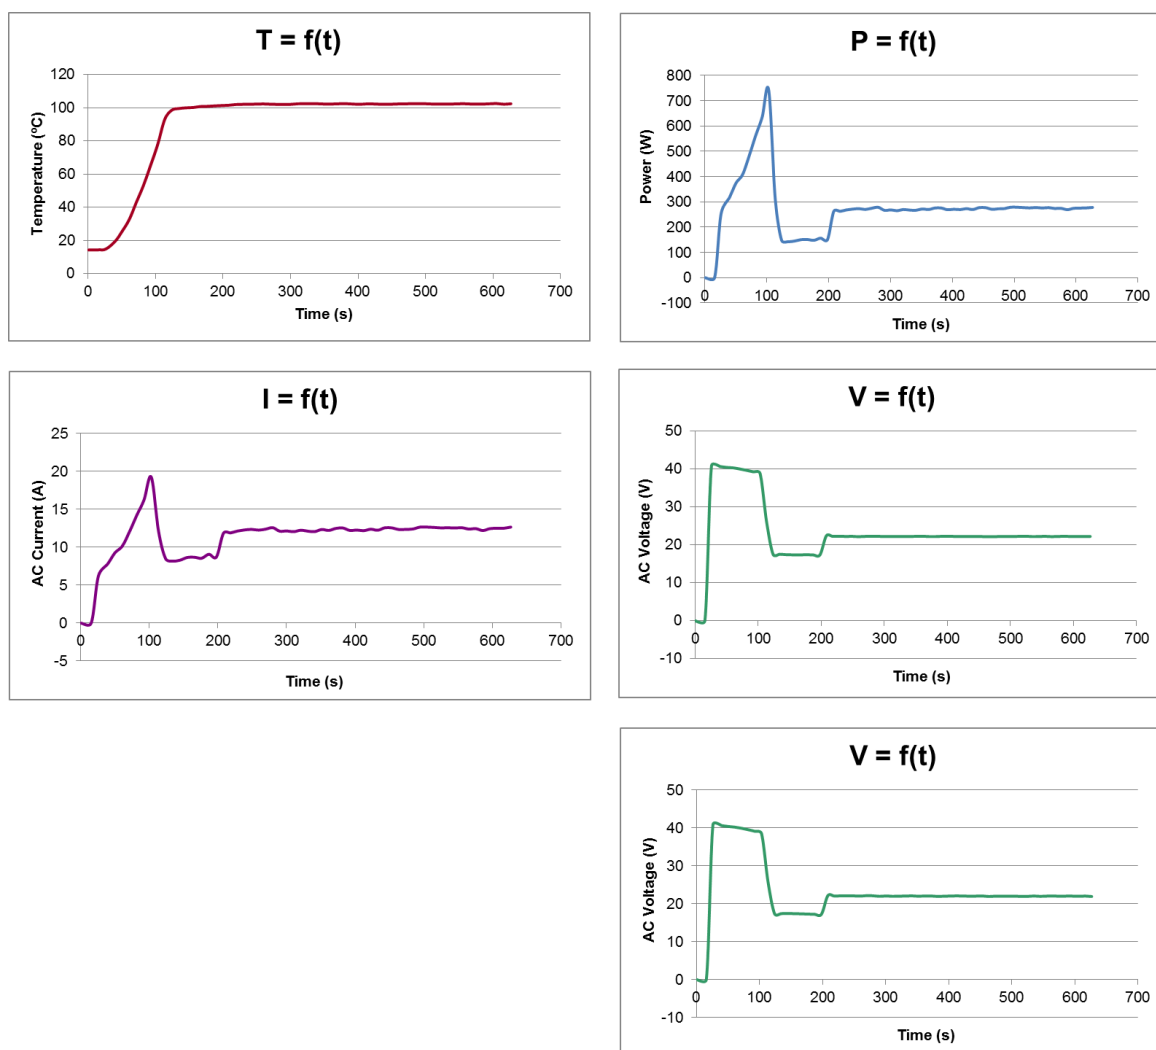

**Figure S9-** Typical results of monitoring the heating power (Temperature, Power, AC Current and AC Voltage) of the Suzuki reaction.

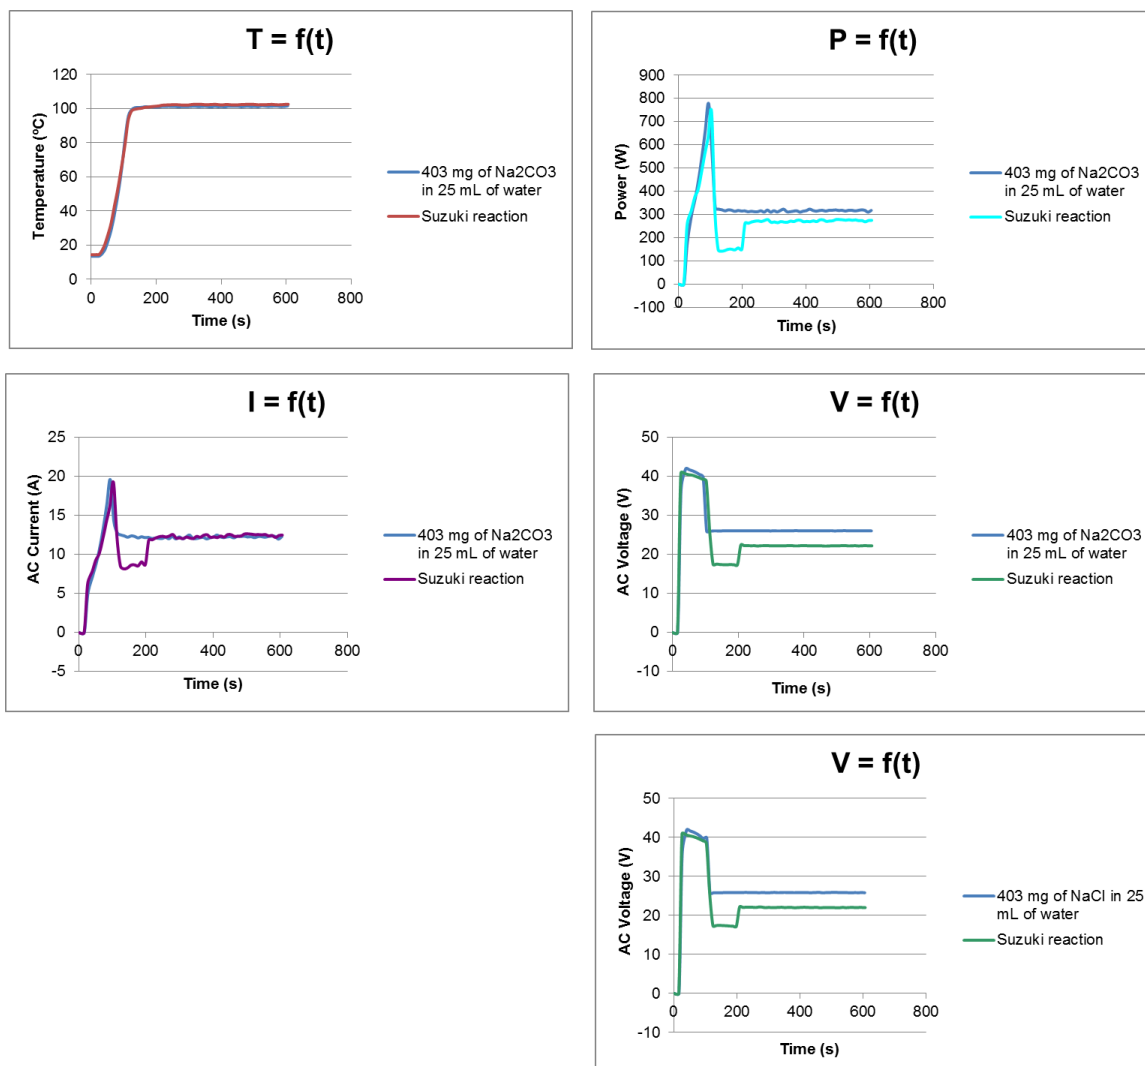

**Figure S10** –Results of monitoring the heating power (Temperature, Power, AC Current and AC Voltage): comparison between the results of the  $\text{Na}_2\text{CO}_3$  solution ( $c=0.15 \text{ mol dm}^{-3}$ ) and those of the Suzuki reaction.

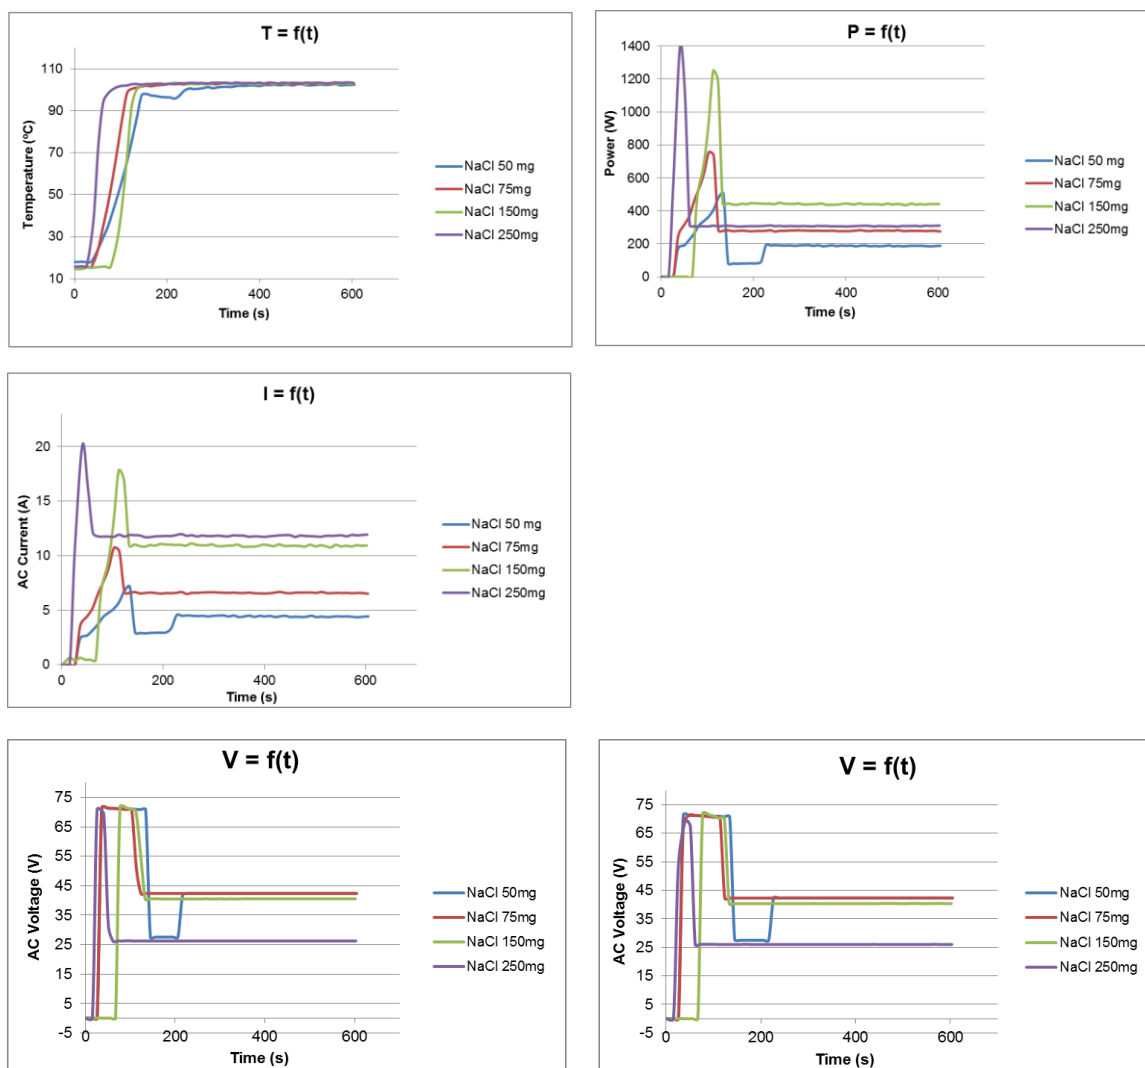

**Figure S11** – Results of monitoring the heating power (Temperature, Power, AC Current and AC Voltage): ohmic heating of NaCl solutions with different concentrations (volume of water: 25 mL; position 10 on the power amplifier to reach the reflux, then the power was reduced manually to maintain the reflux).

### 3. NMR Spectra

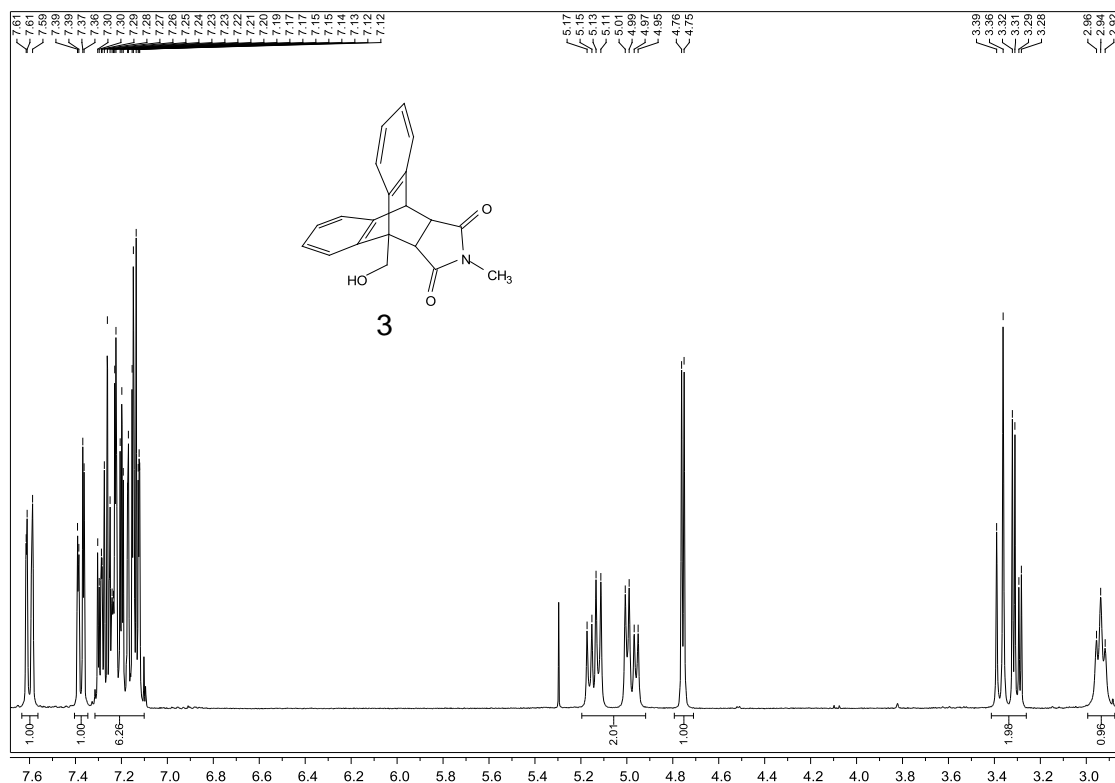

**Figure S12.** <sup>1</sup>H NMR spectrum of compound **3** (CDCl<sub>3</sub>; 300.13 MHz).

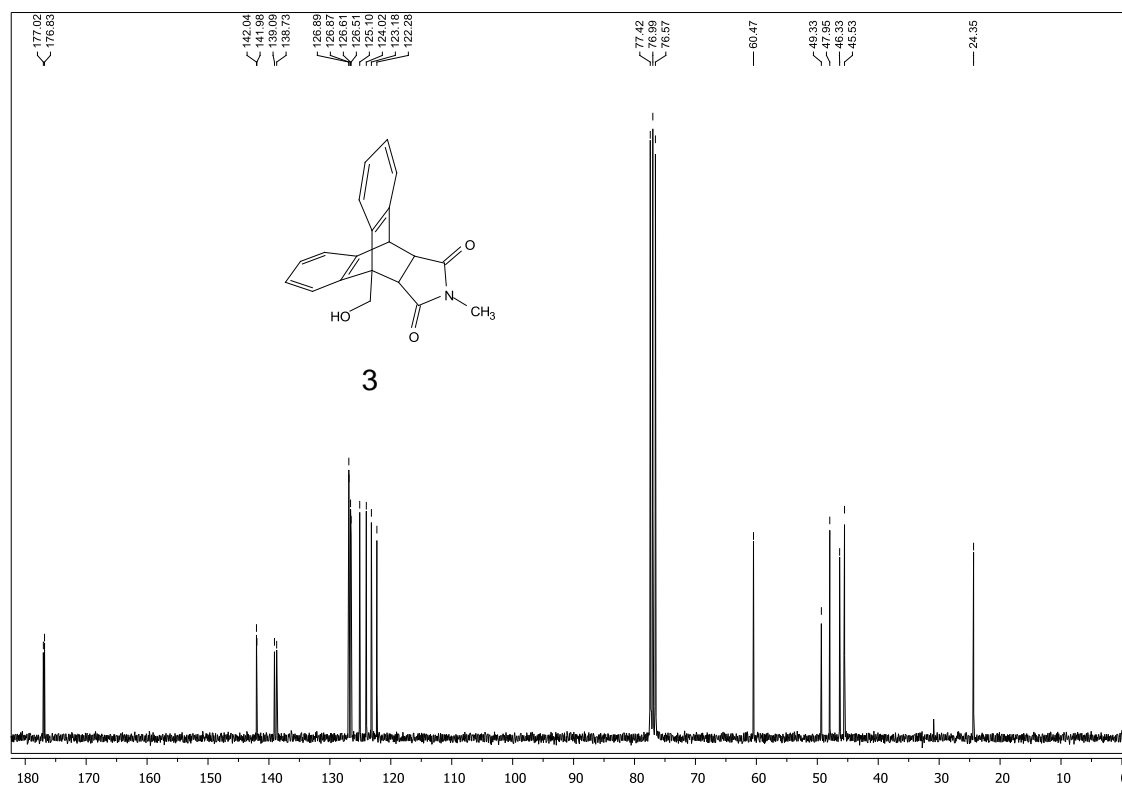

**Figure S13.** <sup>13</sup>C NMR spectrum of compound **3** (CDCl<sub>3</sub>; 75.47 MHz).

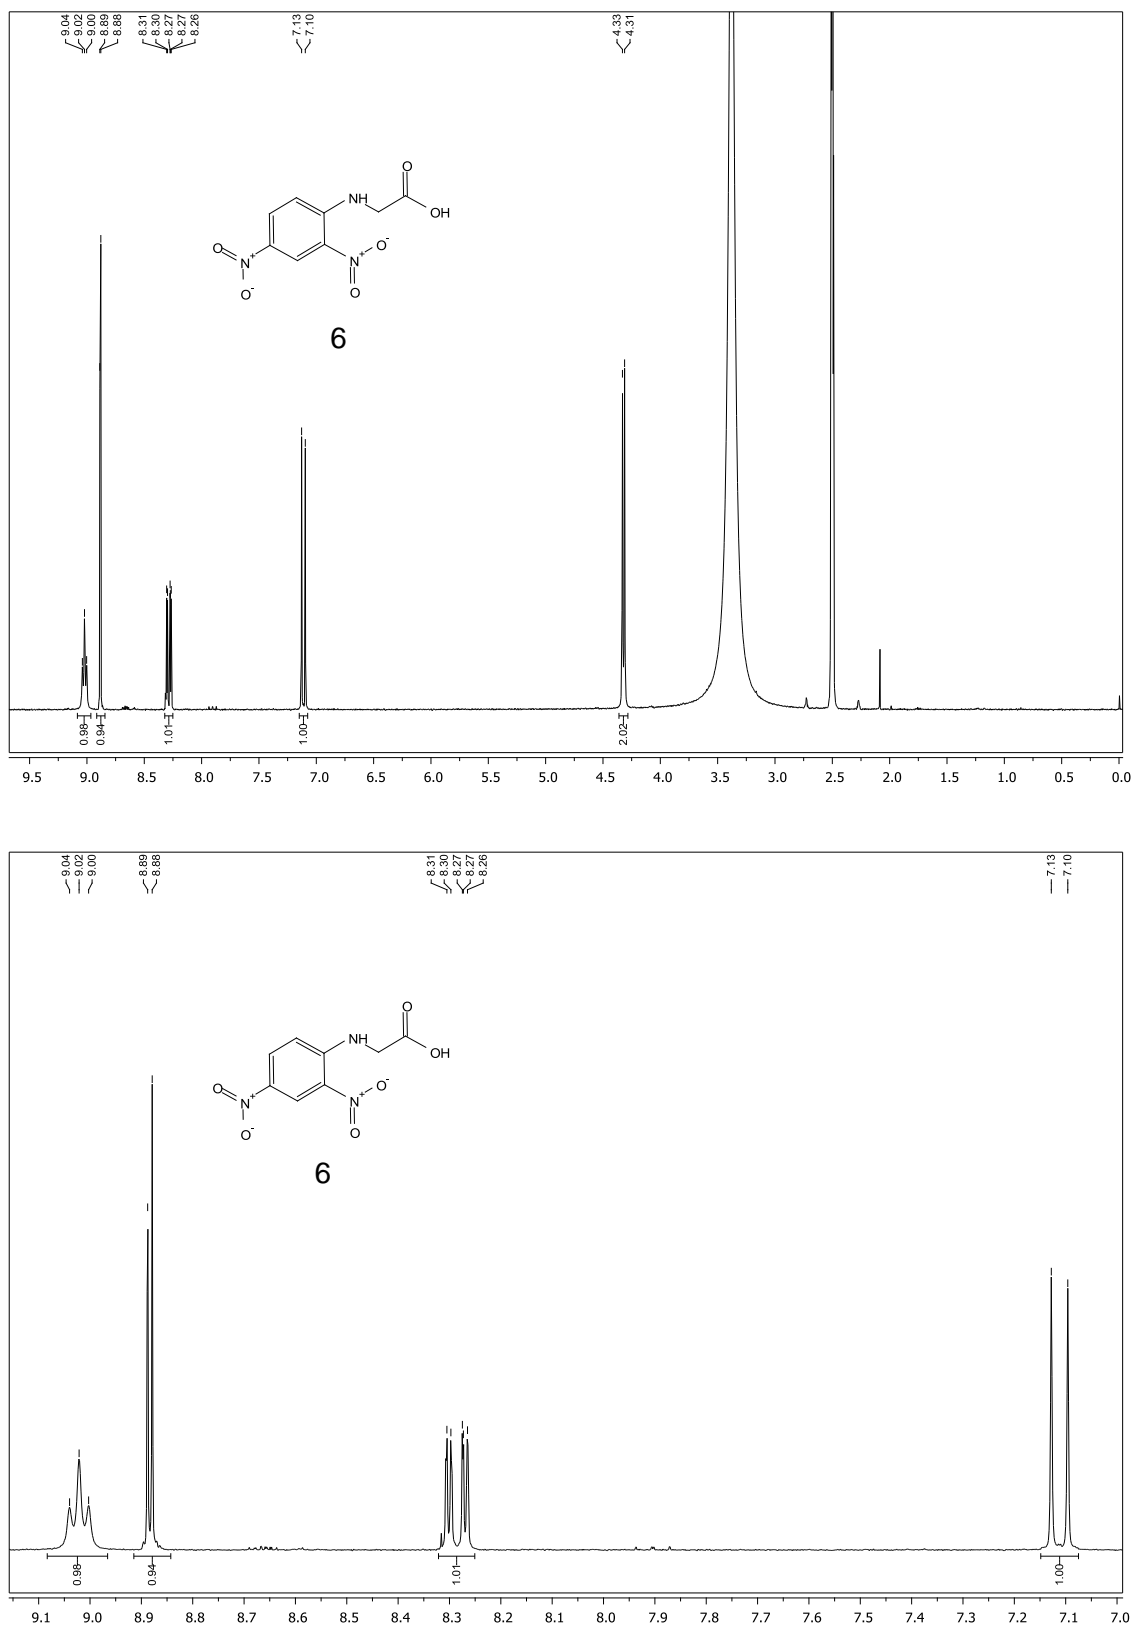

**Figure S14.**  $^1\text{H}$  NMR spectra of compound **6** ( $\text{DMSO-d}_6$ ; 300.13 MHz).

PAPER

www.rsc.org/[journal] | [Green Chemistry]

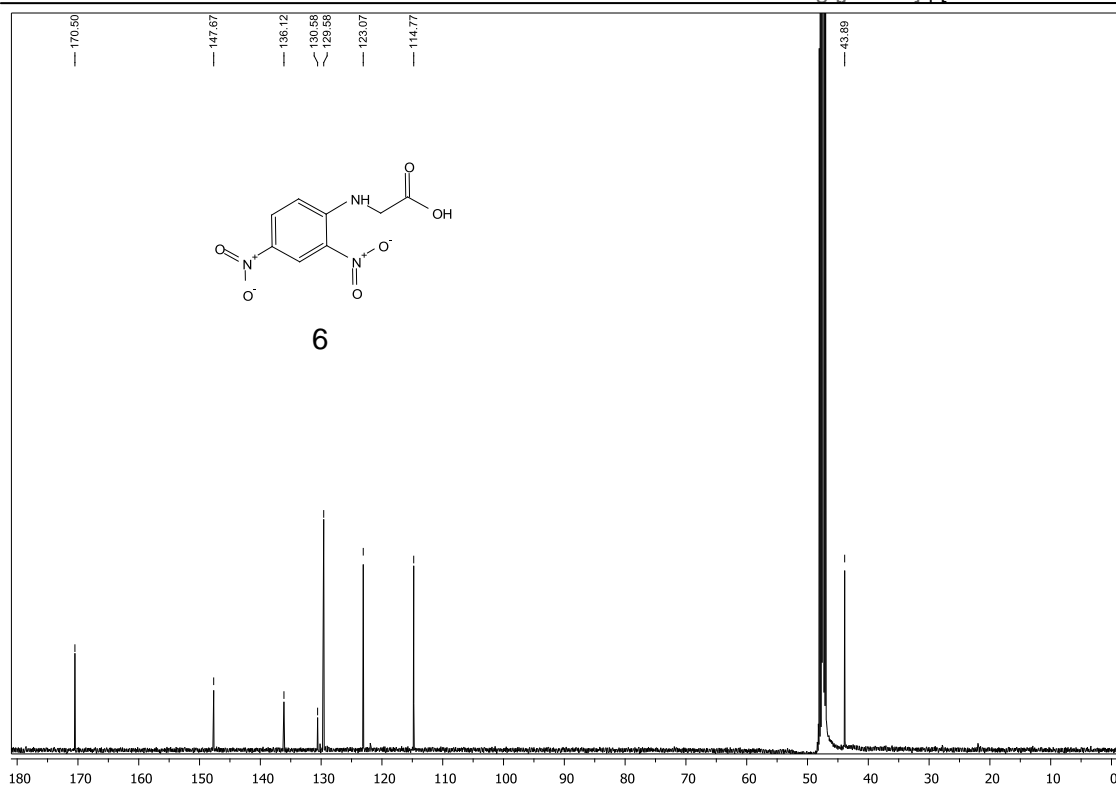

Figure S15. <sup>13</sup>C NMR spectrum of compound 6 (DMSO-d<sub>6</sub>; 125.27 MHz).

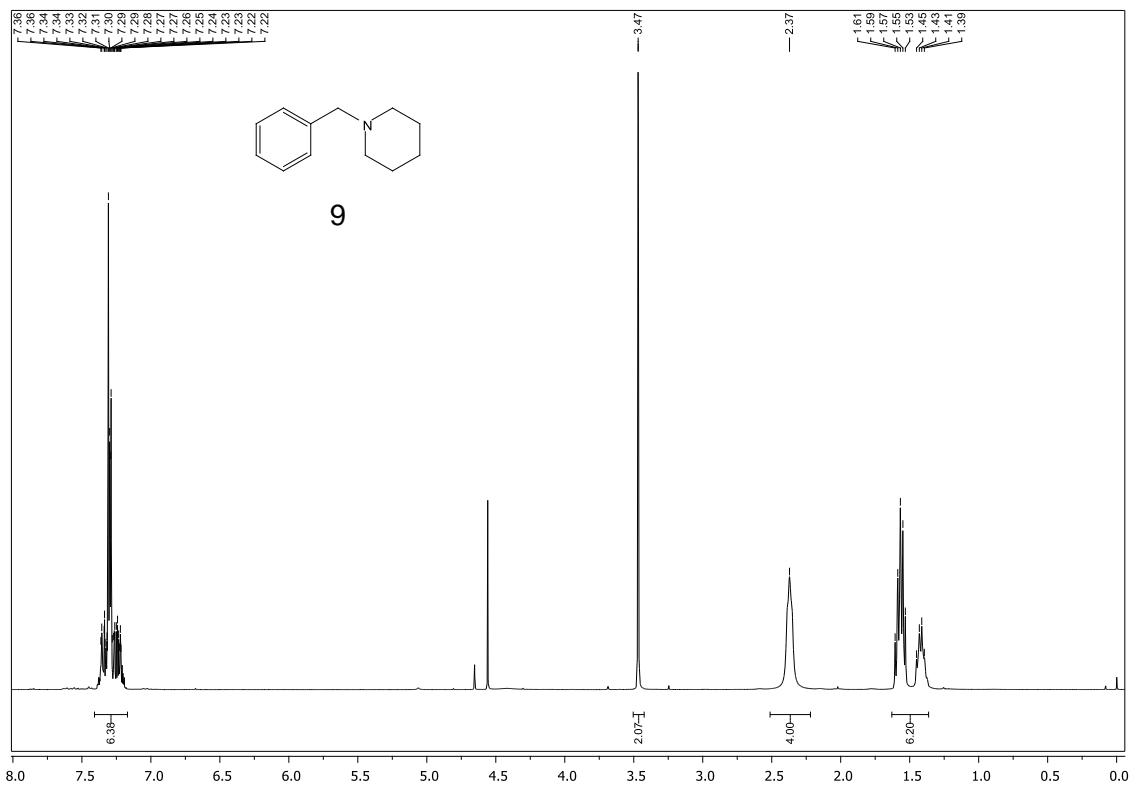

Figure S16. <sup>1</sup>H NMR spectrum of compound 9 (CDCl<sub>3</sub>; 300.13 MHz)



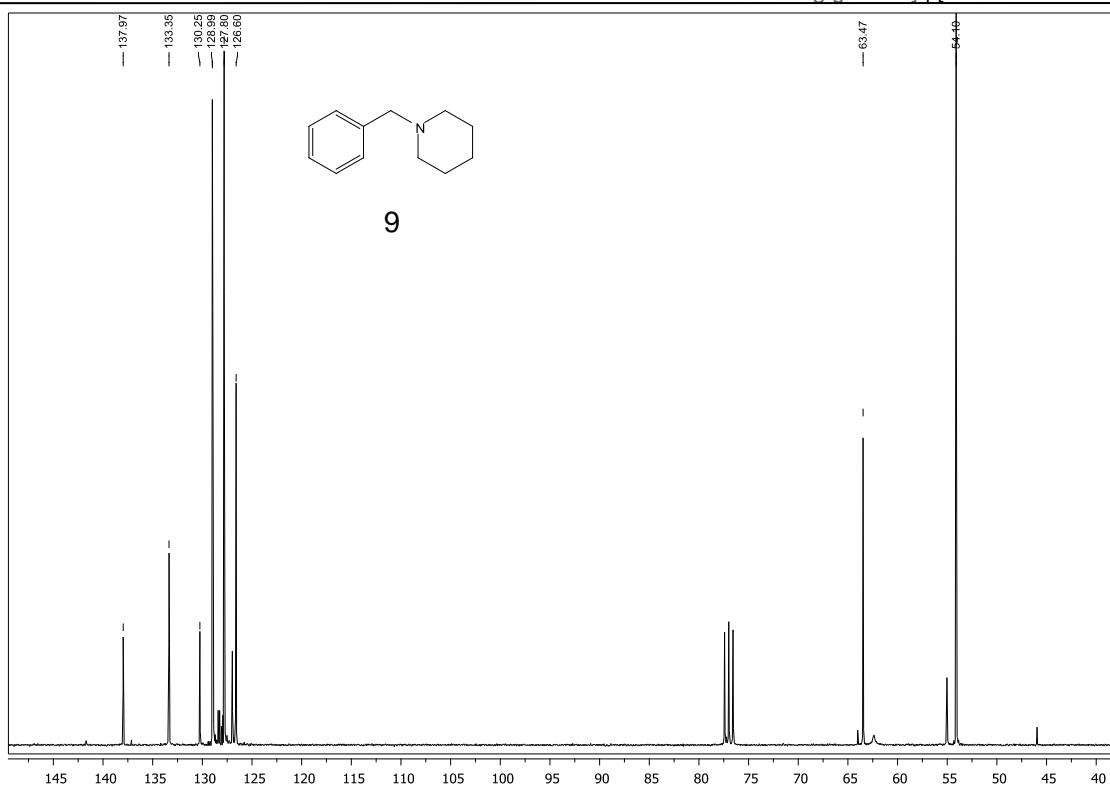

**Figure S17.**  $^{13}\text{C}$  NMR spectrum of compound **9** ( $\text{CDCl}_3$ ; 75.47 MHz).

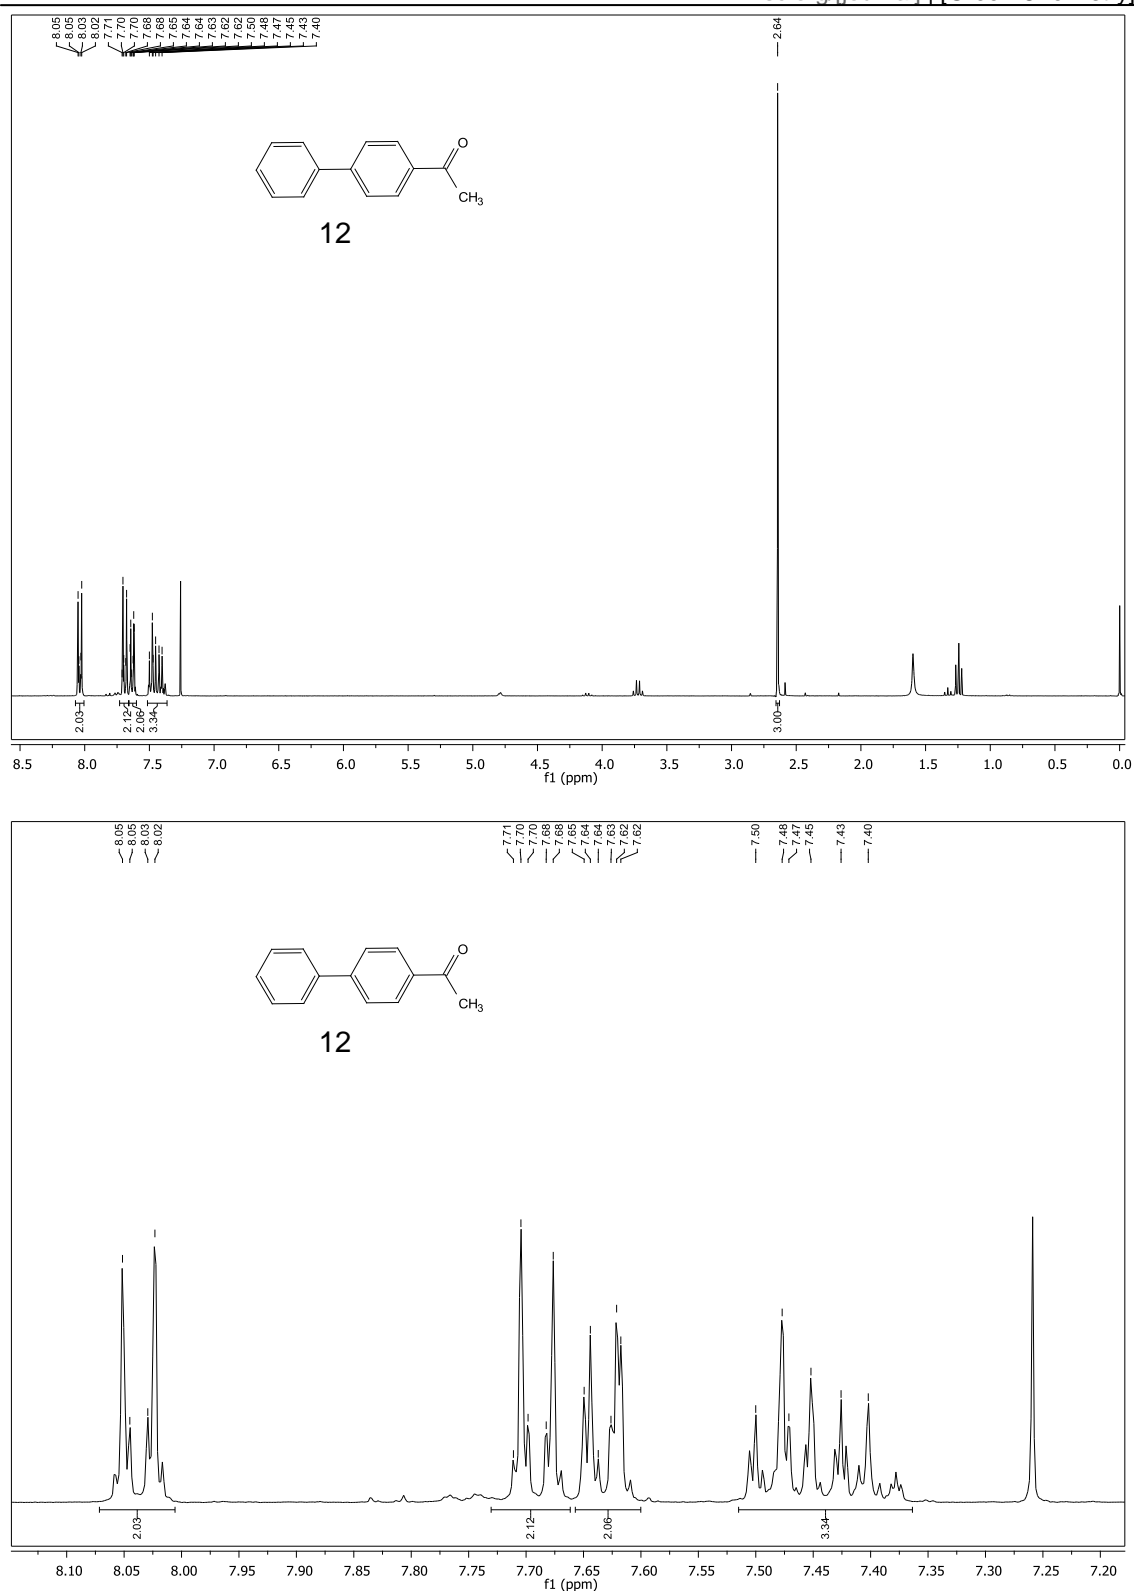

**Figure S18.**  $^1\text{H}$  NMR spectra of compound **12** ( $\text{CDCl}_3$ ; 300.13 MHz).

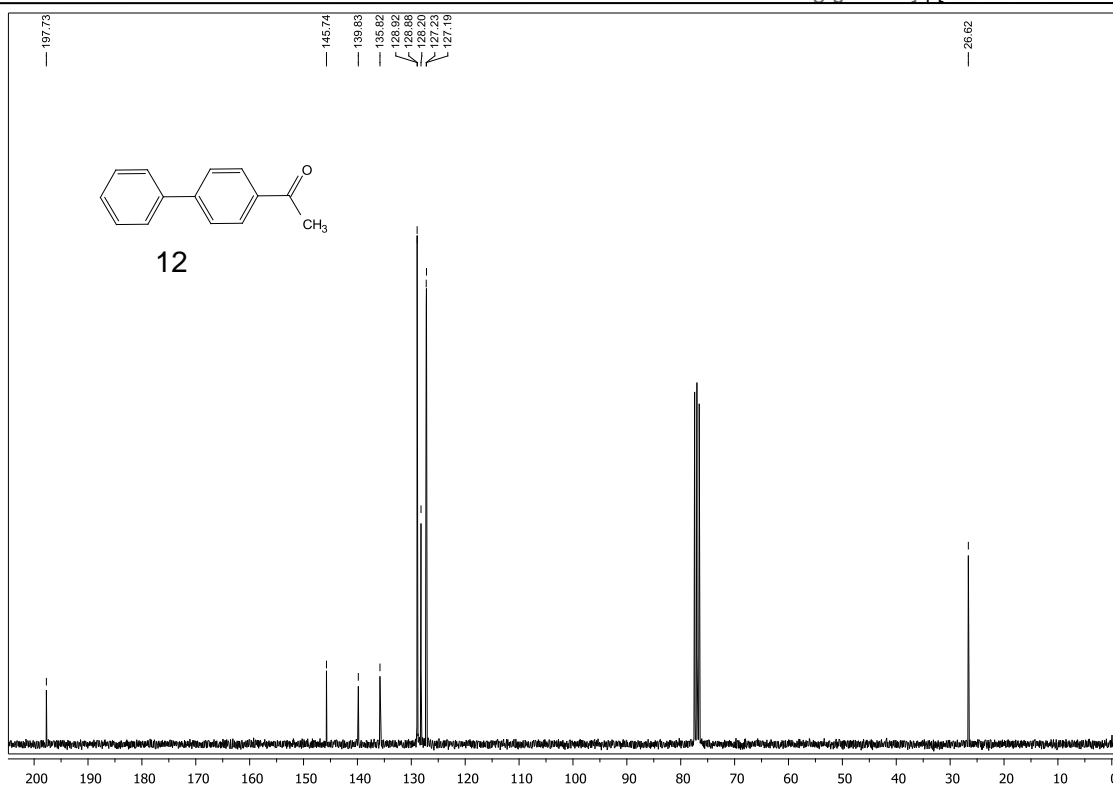

**Figure S19.**  $^{13}\text{C}$  NMR spectrum of compound **12** (CDCl<sub>3</sub>; 75.47 MHz).
